# Supplementary material for: Structure of HCMV glycoprotein B in the postfusion conformation bound to a neutralizing human antibody
Source: PubMed Central journal article supplement (PMC4579600; doi:10.1038/ncomms9176), 2015-09-14
Supplement: ncomms9176-s1.pdf [file ncomms9176-s1.pdf]

**a**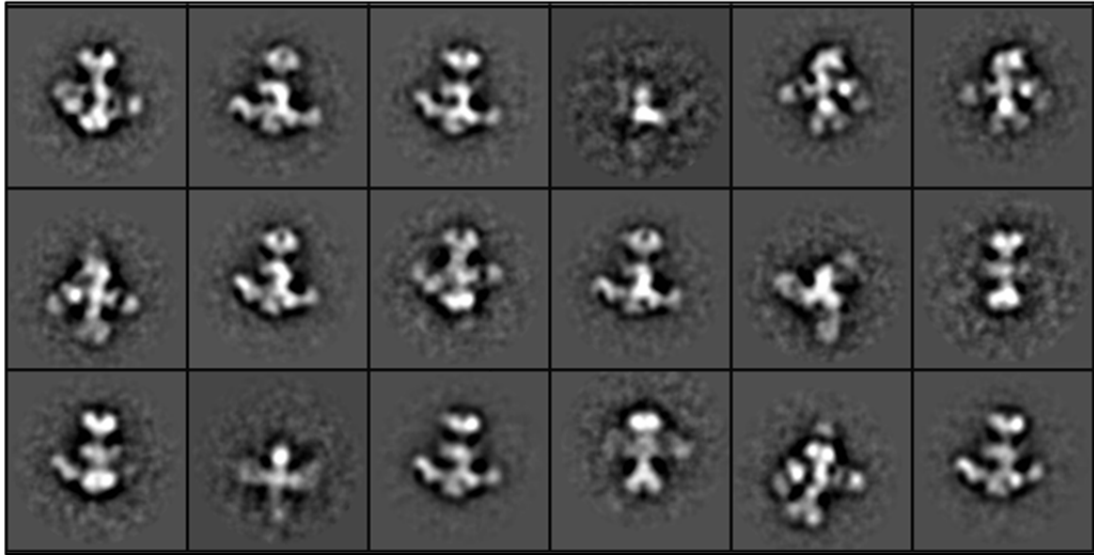**b**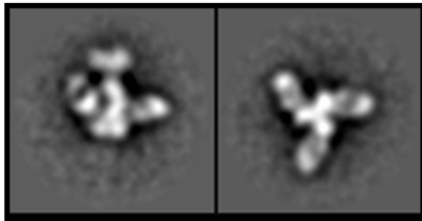

**Supplementary Figure 1. Electron microscopy of gB-698glyco/1G2 Fab complex. a)** Representative images of 2D class averages of gB-698glyc bound to 1G2 Fab. Top views of the complex were underrepresented compared to the side views. **b)** 2D class averages of redissolved crystals of Subtilisin E-treated gB-698glyco/1G2. Crystals of deglycosylated gB-698glyco/1G2 grown in the presence of a 1:1000 ratio of Subtilisin E were looped out of the crystal solution, washed three consecutive times in reservoir buffer (0.1M MMT pH 8.4, 12% PEG-1500, 5% glycerol) and dissolved in 25 mM Tris pH 7.5, 150 mM NaCl for visualization through EM as described in Materials and Methods. 2D class averages of side and top view of the complex are shown.

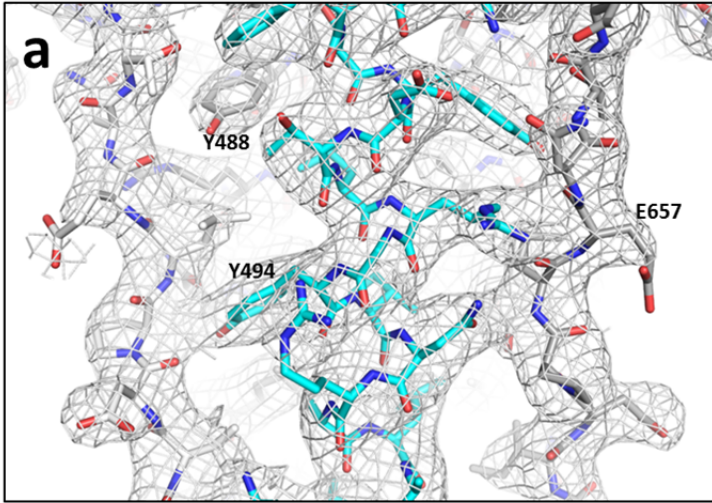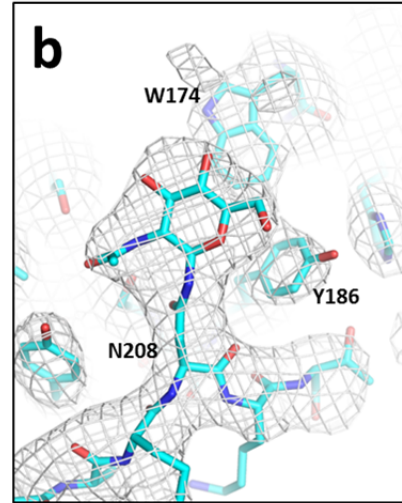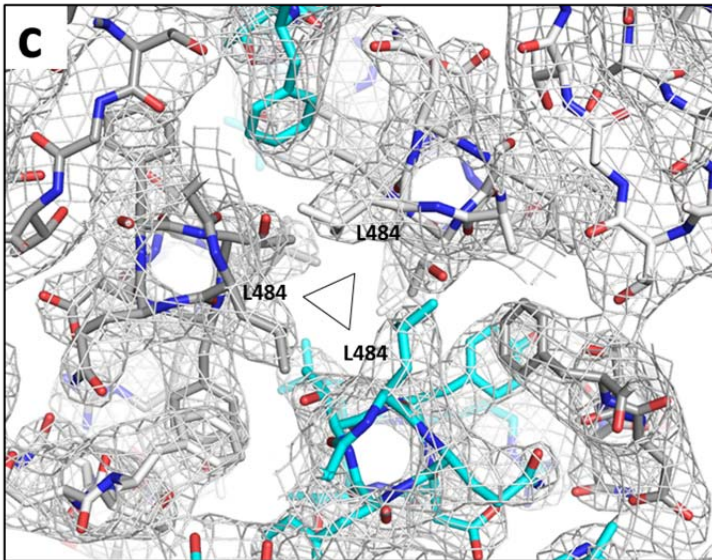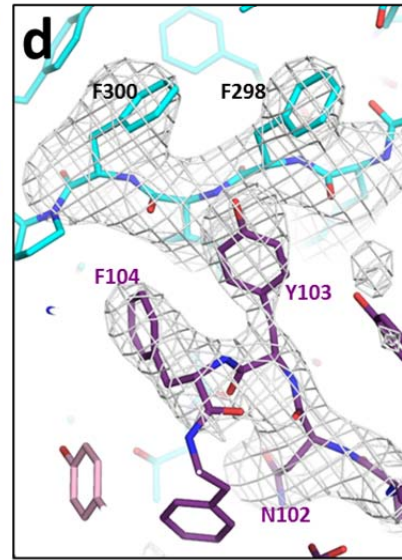

Contd.

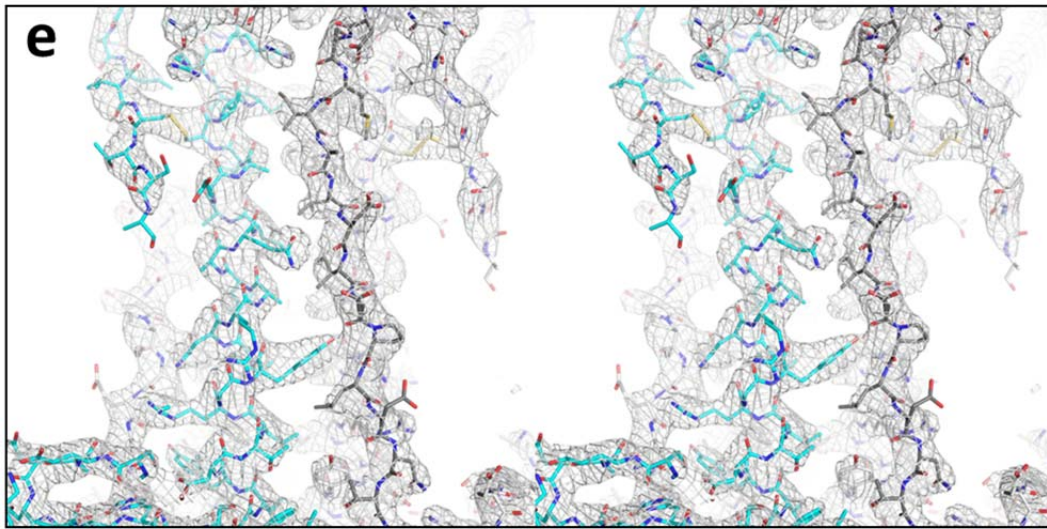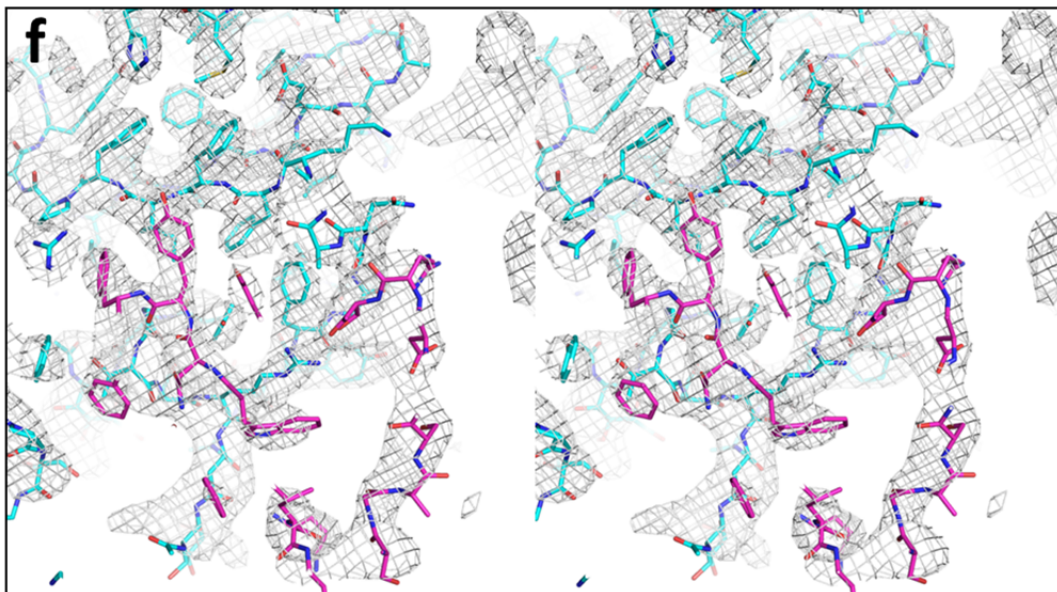

**Supplementary Figure 2. Electron density maps for the  $\Delta$ NgB-glyco/1G2 structure.** 2|Fo|-|Fc| electron density map contoured to  $2\sigma$  along: **a)** domain III helix  $\alpha$ C; **b)** Asn208 and its linked N-acetylglucosamine; **c)** the three-fold axis with a top view around Leu484; **d)** |Fo|-|Fc| “kicked” omit map for gB residues Phe297-Phe300 and 1G2 heavy chain residues Asn102-Phe104 contoured to  $3\sigma$ ; **e)** and **f)** Stereo images of 2|Fo|-|Fc| electron density maps contoured to  $2\sigma$ . Electron density maps are shown as a mesh around gB residues in stick representation. All images were created in Pymol.



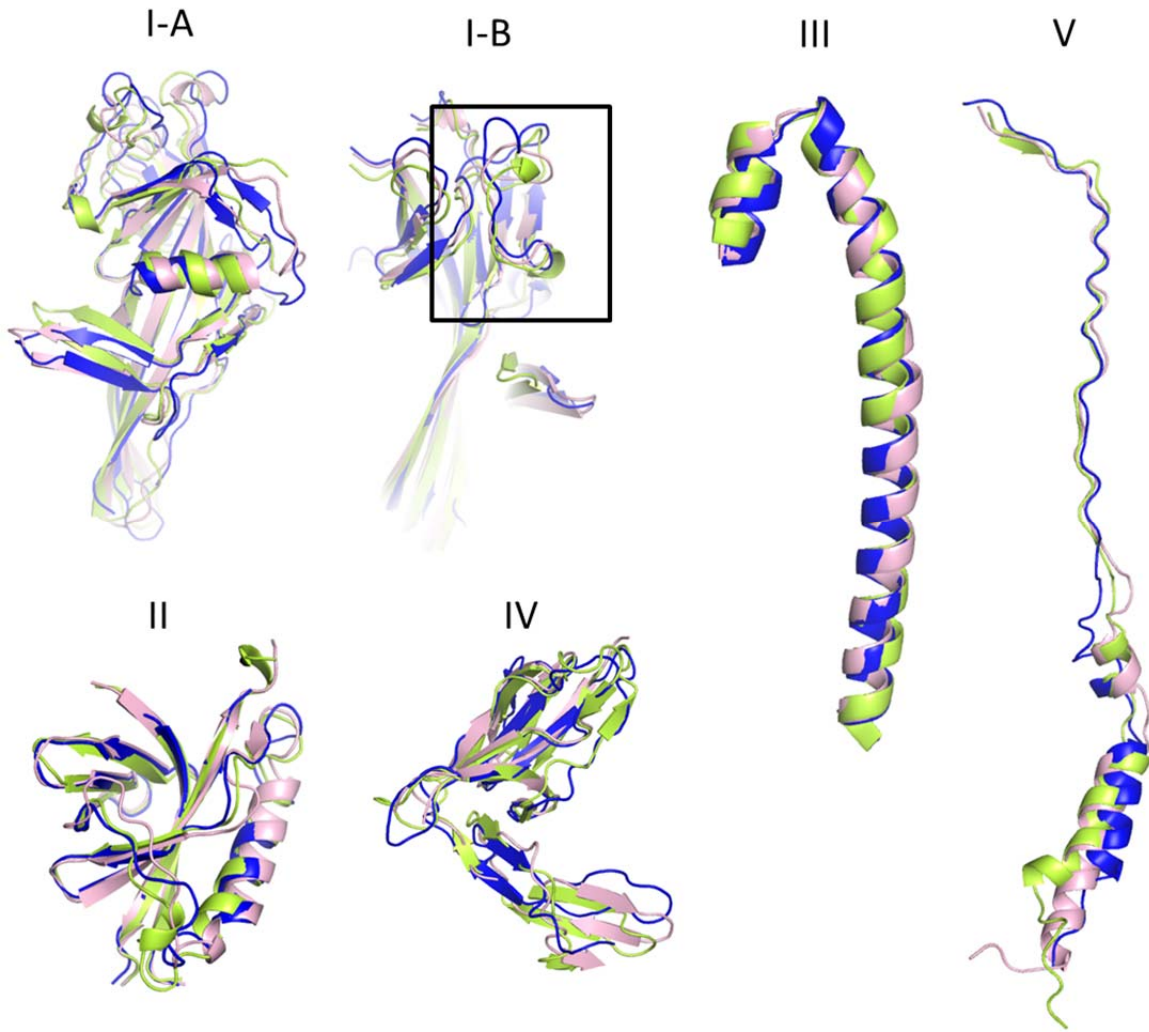

**Supplementary Figure 3. Comparison of individual domains of HCMV gB with HSV and EBV gB.** Individual domains of HCMV gB (I-V) were superimposed on the corresponding domains in HSV (green) or EBV gB (pink) using LSQKAB in CCP4. The view in I-B is rotated 60 degrees away from the reader from the view in I-A, with the 1G2 epitope boxed in black.

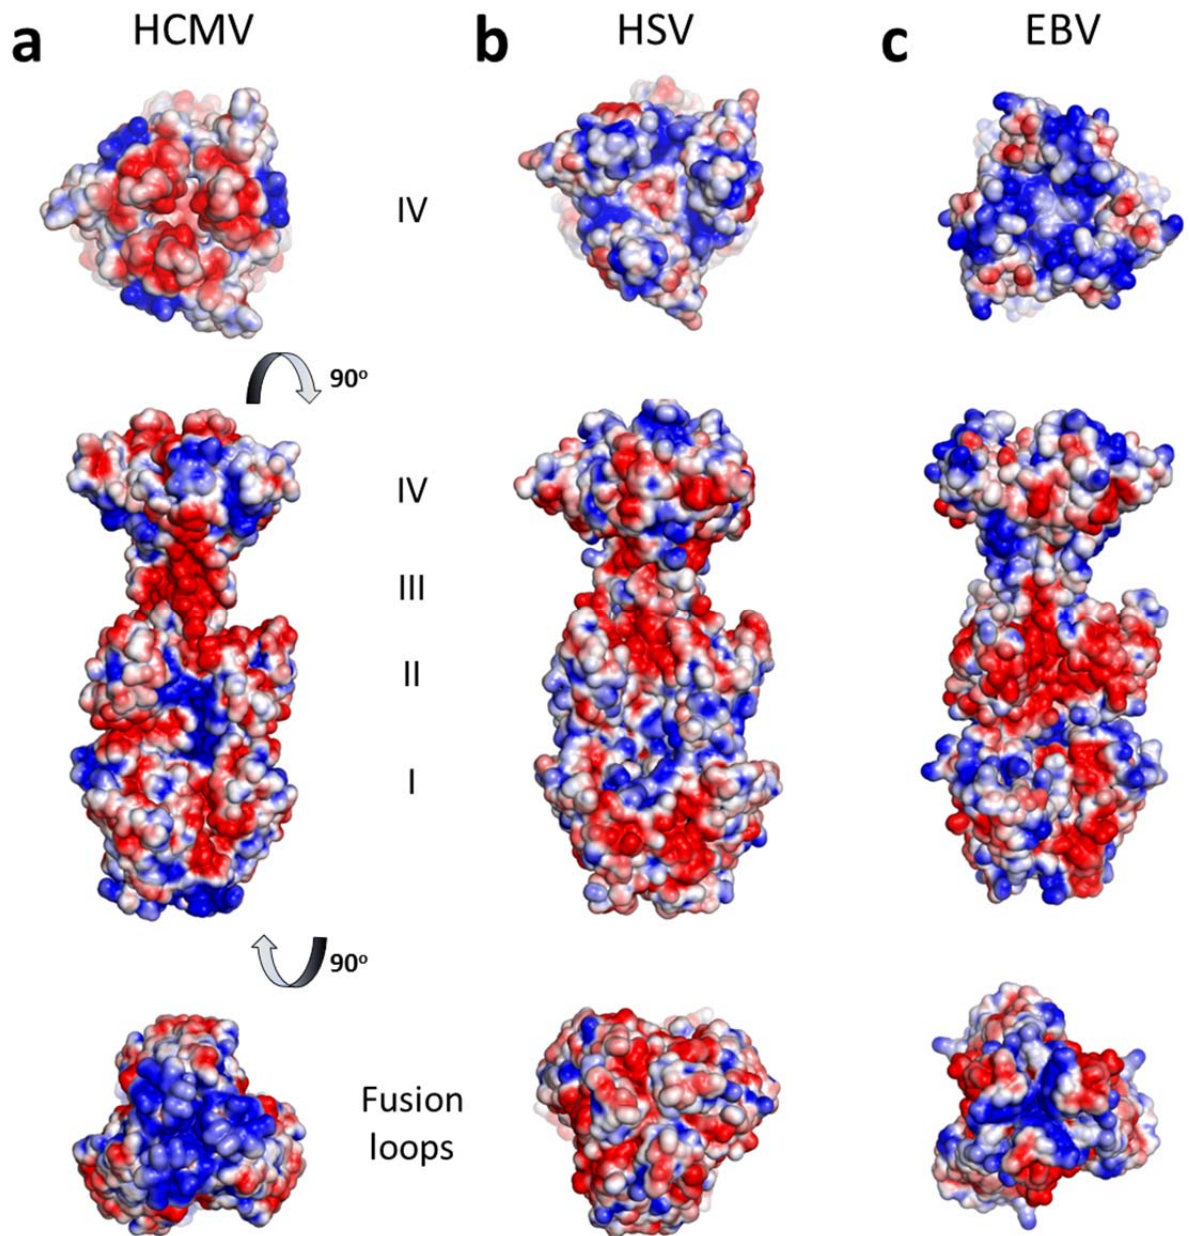

**Supplementary Figure 4. Comparison of surface charge distribution of herpesvirus gB.**

Surface charge distribution of HCMV (a), HSV (b) and EBV (c) gB generated using PyMol, contoured to -2 to +2  $kT/e$ . Blue represents positive charge and red represents negative. The top and bottom panels are views generated by rotating the view in the middle  $90^\circ$  towards and away from the reader, respectively.



(1) 1 10 20 30 40 50 60 70 86

Merlin (1) MESRIWCLVVCVNLICIVCLGAAVSSS **ST-RGTSATHSHHSHTTAAHSRSGSV-SQRVTSSQTVSHGVN**ETIYNTTLKYGDVVGV  
 8816 (1) MESRIWCLVVCVNLICIVCLGAAVSSS **TS---RATSTHNGNHTSHHTSAQTRRSIS**SQRVTSS**EA**VSH**RAN**ETIYNTTLKYGDVVGV  
 8817 (1) MESRIWCLVVCVNLICIVCLGAAVSSS **ST-RGTSATHSHHSHTTAAHSRSGSV-SQRVTSSQTVSHGVN**ETIYNTTLKYGDVVGV  
 TR (1) MESRIWCLVVCVNLICIVCLGAAVSSS **STRGTSATHSHHSHTTAAHSRSGSV-SQRVTSSQTVSHGVN**ETIYNTTLKYGDVVGV  
 8819 (1) MESRIWCLVVCVNLICIVCLGAAVSSS **ST-RGTSATHSHHSHTTAAHSRSGSV-SQRVTSSQTVSHGVN**ETIYNTTLKYGDVVGV  
 8822 (1) MESRIWCLVVCVNLICIVCLGAAVSSS **ST--SHATSTHNRSHSTSAQTRRSIS**SQHVTSS**EA**VSH**RAN**ETIYNTTLKYGDVVGV  
 8824 (1) MESRIWCLVVCVNLICIVCLGAAVSSS **TS---RATSTHNGNHTSHHTSAQTRRSIS**SQRVTSS**EA**VSH**RAN**ETIYNTTLKYGDVVGV  
 TM-E28175 (1) MESRIWCLVVCVNLICIVCLGAAVSSS **ST-RGTSATHSHHSHTTAAHSRSGSV-SQRVTSSQTVSHGVN**ETIYNTTLKYGDVVGV  
 8818 (1) MESRIWCLVVCVNLICIVCLGAAVSSS **ST--SHATSTAHNGSHSTSAQTRRSIS**SQHVTSS**EA**VSH**RAN**ETIYNTTLKYGDVVGV  
 8821 (1) MESRIWCLVVCVNLICIVCLGAAVSSS **TS---HATSTHNGSHSTSAQTRRSIS**SQHVTSS**EA**VSH**RAN**ETIYNTTLKYGDVVGV  
 TM-31354 (1) MESRIWCLVVCVNLICIVCLGAAVSSS **STSHATSTSTHNGSHSTRTSAQTRRSV**S--SQHVTSS**EA**VSH**RAN**ETIYNTTLKYGDVVGV  
 VR1814 (1) MESRIWCLVVCVNLICIVCLGAAVSSS **STSHATSTSAHNGSHSTRTSAQTRRSV**S--SQHVTSS**EA**VSH**RAN**ETIYNTTLKYGDVVGV  
 Consensus (1) MESRIWCLVVCVNLICIVCLGAAVSSS**ST** **GTSATHSH** **SHTTSTA** **ARS** **SV** **SQRVTSS****EA****VSH****RAN**ETIYNTTLKYGDVVGV

(87) 87 100 110 120 130 140 150 160 172

Merlin (85) N**TTKY**PYRVC**SMA**QGTDLIR**FERNIVCTSMK**PI**NEDL**DEGIMVVYKRN**IVAHTFKVRVYQK**VLTFRRSY**AIHTTY**LLGSNTEYVA  
 8816 (83) N**TTKY**PYRVC**SMA**QGTDLIR**FERNIVCTPMK**PI**NEDL**DEGIMVVYKRN**IVAHTFKVRVYQK**VLTFRRSY**AIHTTY**LLGSNTEYVA  
 8817 (85) N**TTKY**PYRVC**SMA**QGTDLIR**FERNIVCTSMK**PI**NEDL**DEGIMVVYKRN**IVAHTFKVRVYQK**VLTFRRSY**AIHTTY**LLGSNTEYVA  
 TR (86) N**TTKY**PYRVC**SMA**QGTDLIR**FERNIVCTSMK**PI**NEDL**DEGIMVVYKRN**IVAHTFKVRVYQK**VLTFRRSY**AIHTTY**LLGSNTEYVA  
 8819 (85) N**TTKY**PYRVC**SMA**QGTDLIR**FERNIVCTSMK**PI**NEDL**DEGIMVVYKRN**IVAHTFKVRVYQK**VLTFRRSY**AIHTTY**LLGSNTEYVA  
 8822 (85) N**TTKY**PYRVC**SMA**QGTDLIR**FERNIVCTSMK**PI**NEDL**DEGIMVVYKRN**IVAHTFKVRVYQK**VLTFRRSY**AIHTTY**LLGSNTEYVA  
 8824 (83) N**TTKY**PYRVC**SMA**QGTDLIR**FERNIVCTSMK**PI**NEDL**DEGIMVVYKRN**IVAHTFKVRVYQK**VLTFRRSY**AIHTTY**LLGSNTEYVA  
 TM-E28175 (85) N**TTKY**PYRVC**SMA**QGTDLIR**FERNIVCTSMK**PI**NEDL**DEGIMVVYKRN**IVAHTFKVRVYQK**VLTFRRSY**AIHTTY**LLGSNTEYVA  
 8818 (85) N**TTKY**PYRVC**SMA**QGTDLIR**FERNIVCTPMK**PI**NEDL**DEGIMVVYKRN**IVAHTFKVRVYQK**VLTFRRSY**AIHTTY**LLGSNTEYVA  
 8821 (84) N**TTKY**PYRVC**SMA**QGTDLIR**FERNIVCTPMK**PI**NEDL**DEGIMVVYKRN**IVAHTFKVRVYQK**VLTFRRSY**AIHTTY**LLGSNTEYVA  
 TM-31354 (85) N**TTKY**PYRVC**SMA**QGTDLIR**FERNIVCTPMK**PI**NEDL**DEGIMVVYKRN**IVAHTFKVRVYQK**VLTFRRSY**AIHTTY**LLGSNTEYVA  
 VR1814 (85) N**TTKY**PYRVC**SMA**QGTDLIR**FERNIVCTSMK**PI**NEDL**DEGIMVVYKRN**IVAHTFKVRVYQK**VLTFRRSY**AIHTTY**LLGSNTEYVA  
 Consensus (87) N**TTKY**PYRVC**SMA**QGTDLIR**FERNIVCTSMK**PI**NEDL**DEGIMVVYKRN**IVAHTFKVRVYQK**VLTFRRSY**AIHTTY**LLGSNTEYVA

(173) 173 180 190 200 210 220 230 240 258

Merlin (171) P**PMWE**IHHIN**SHS**QCYSSYSRV**IAGTVFVAYHR**DSYENK**TMQLM**DDY**SNTHS**TR**YVTVK**DQWHSRG**STWLYR**ETCN**LNCMV**ITIT  
 8816 (169) P**PMWE**IHHIN**SHS**QCYSSYSRV**IAGTVFVAYHR**DSYENK**TMQLM**DDY**SNTHS**TR**YVTVK**DQWHSRG**STWLYR**ETCN**LNCMV**ITIT  
 8817 (171) P**PMWE**IHHIN**SHS**QCYSSYSRV**IAGTVFVAYHR**DSYENK**TMQLM**DDY**SNTHS**TR**YVTVK**DQWHSRG**STWLYR**ETCN**LNCMV**ITIT  
 TR (172) P**PMWE**IHHIN**SHS**QCYSSYSRV**IAGTVFVAYHR**DSYENK**TMQLM**DDY**SNTHS**TR**YVTVK**DQWHSRG**STWLYR**ETCN**LNCMV**ITIT  
 8819 (171) P**PMWE**IHHIN**SHS**QCYSSYSRV**IAGTVFVAYHR**DSYENK**TMQLM**DDY**SNTHS**TR**YVTVK**DQWHSRG**STWLYR**ETCN**LNCMV**ITIT  
 8822 (171) P**PMWE**IHHIN**SHS**QCYSSYSRV**IAGTVFVAYHR**DSYENK**TMQLM**DDY**SNTHS**TR**YVTVK**DQWHSRG**STWLYR**ETCN**LNCMV**ITIT  
 8824 (169) P**PMWE**IHHIN**SHS**QCYSSYSRV**IAGTVFVAYHR**DSYENK**TMQLM**DDY**SNTHS**TR**YVTVK**DQWHSRG**STWLYR**ETCN**LNCMV**ITIT  
 TM-E28175 (171) P**PMWE**IHHIN**SHS**QCYSSYSRV**IAGTVFVAYHR**DSYENK**TMQLM**DDY**SNTHS**TR**YVTVK**DQWHSRG**STWLYR**ETCN**LNCMV**ITIT  
 8818 (171) P**PMWE**IHHIN**SHS**QCYSSYSRV**IAGTVFVAYHR**DSYENK**TMQLM**DDY**SNTHS**TR**YVTVK**DQWHSRG**STWLYR**ETCN**LNCMV**ITIT  
 8821 (170) P**PMWE**IHHIN**SHS**QCYSSYSRV**IAGTVFVAYHR**DSYENK**TMQLM**DDY**SNTHS**TR**YVTVK**DQWHSRG**STWLYR**ETCN**LNCMV**ITIT  
 TM-31354 (171) P**PMWE**IHHIN**SHS**QCYSSYSRV**IAGTVFVAYHR**DSYENK**TMQLM**DDY**SNTHS**TR**YVTVK**DQWHSRG**STWLYR**ETCN**LNCMV**ITIT  
 VR1814 (171) P**PMWE**IHHIN**SHS**QCYSSYSRV**IAGTVFVAYHR**DSYENK**TMQLM**DDY**SNTHS**TR**YVTVK**DQWHSRG**STWLYR**ETCN**LNCMV**ITIT  
 Consensus (173) P**PMWE**IHHIN**SHS**QCYSSYSRV**IAGTVFVAYHR**DSYENK**TMQLM**DDY**SNTHS**TR**YVTVK**DQWHSRG**STWLYR**ETCN**LNCMV**ITIT

(259) 259 270 280 290 300 310 320 330 344

Merlin (257) A**RSKY**PYH**FFAT**STGDVVD**ISPFY**NGT**NRN**SY**FGENAD**KFF**IFPN**Y**TI**VSDFGR**PNSA**LE**THRLVA**FLERAD**S**VI**SWDI**QDEKNV  
 8816 (255) A**RSKY**PYH**FFAT**STGDVVD**ISPFY**NGT**NRN**SY**FGENAD**KFF**IFPN**Y**TI**VSDFGR**PNSA**LE**THRLVA**FLERAD**S**VI**SWDI**QDEKNV  
 8817 (257) A**RSKY**PYH**FFAT**STGDVVD**ISPFY**NGT**NRN**SY**FGENAD**KFF**IFPN**Y**TI**VSDFGR**PNSA**LE**THRLVA**FLERAD**S**VI**SWDI**QDEKNV  
 TR (258) A**RSKY**PYH**FFAT**STGDVVD**ISPFY**NGT**NRN**SY**FGENAD**KFF**IFPN**Y**TI**VSDFGR**PNSA**LE**THRLVA**FLERAD**S**VI**SWDI**QDEKNV  
 8819 (257) A**RSKY**PYH**FFAT**STGDVVD**ISPFY**NGT**NRN**SY**FGENAD**KFF**IFPN**Y**TI**VSDFGR**PNSA**LE**THRLVA**FLERAD**S**VI**SWDI**QDEKNV  
 8822 (257) A**RSKY**PYH**FFAT**STGDVVD**ISPFY**NGT**NRN**SY**FGENAD**KFF**IFPN**Y**TI**VSDFGR**PNSA**LE**THRLVA**FLERAD**S**VI**SWDI**QDEKNV  
 8824 (255) A**RSKY**PYH**FFAT**STGDVVD**ISPFY**NGT**NRN**SY**FGENAD**KFF**IFPN**Y**TI**VSDFGR**PNSA**LE**THRLVA**FLERAD**S**VI**SWDI**QDEKNV  
 TM-E28175 (257) A**RSKY**PYH**FFAT**STGDVVD**ISPFY**NGT**NRN**SY**FGENAD**KFF**IFPN**Y**TI**VSDFGR**PNSA**LE**THRLVA**FLERAD**S**VI**SWDI**QDEKNV  
 8818 (257) A**RSKY**PYH**FFAT**STGDVVD**ISPFY**NGT**NRN**SY**FGENAD**KFF**IFPN**Y**TI**VSDFGR**ANSA**PE**THRLVA**FLERAD**S**VI**SWDI**QDEKNV  
 8821 (256) A**RSKY**PYH**FFAT**STGDVVD**ISPFY**NGT**NRN**SY**FGENAD**KFF**IFPN**Y**TI**VSDFGR**ANSA**PE**THRLVA**FLERAD**S**VI**SWDI**QDEKNV  
 TM-31354 (257) A**RSKY**PYH**FFAT**STGDVVD**ISPFY**NGT**NRN**SY**FGENAD**KFF**IFPN**Y**TI**VSDFGR**ANSA**PE**THRLVA**FLERAD**S**VI**SWDI**QDEKNV  
 VR1814 (257) A**RSKY**PYH**FFAT**STGDVVD**ISPFY**NGT**NRN**SY**FGENAD**KFF**IFPN**Y**TI**VSDFGR**ANSA**PE**THRLVA**FLERAD**S**VI**SWDI**QDEKNV  
 Consensus (259) A**RSKY**PYH**FFAT**STGDVVD**ISPFY**NGT**NRN**SY**FGENAD**KFF**IFPN**Y**TI**VSDFGR**PNSA**LE**THRLVA**FLERAD**S**VI**SWDI**QDEKNV

Contd.



(345) 345 350 360 370 380 390 400 410 420 430

Merlin (343) TCQLTFWEASERTIRSEAE SYHFSSAKMTATFLSKKQEVNMSD **SALDCVRDEA** INKLQQIFNTSYNQTYEKYGNVSVFETTGGGLV  
 8816 (341) TCQLTFWEASERTIRSEAE SYHFSSAKMTATFLSKKQEVNMSD **SALDCVRDEA** INKLQQIFN~~AS~~SYNQTYEKYGNVSVFETTGGGLV  
 8817 (343) TCQLTFWEASERTIRSEAE SYHFSSAKMTATFLSKKQEVNMSD **SALDCVRDEA** INKLQQIFNTSYNQTYEKYGNVSVFETTGGGLV  
 TR (344) TCQLTFWEASERTIRSEAE SYHFSSAKMTATFLSKKQEVNMSD **SALDCVRDEA** INKLQQIFNTSYNQTYEKYGNVSVFETTGGGLV  
 8819 (343) TCQLTFWEASERTIRSEAE SYHFSSAKMTATFLSKKQEVNMSD **SALDCVRDEA** INKLQQIFNTSYNQTYEKYGNVSVFETTGGGLV  
 8822 (343) TCQLTFWEASERTIRSEAE SYHFSSAKMTATFLSKKQEVNMSD **SALDCVRDEA** INKLQQIFNTSYNQTYEKYGNVSVFETTGGGLV  
 8824 (341) TCQLTFWEASERTIRSEAE SYHFSSAKMTATFLSKKQEVNMSD **SALDCVRDEA** INKLQQIFN~~AS~~SYNQTYEKYGNVSVFETTGGGLV  
 TM-E28175 (343) TCQLTFWEASERTIRSEAE SYHFSSAKMTATFLSKKQEVNMSD **SALDCVRDEA** INKLQQIFNTSYNQTYEKYGNVSVFETTGGGLV  
 8818 (343) TCQLTFWEASERTIRSEAE SYHFSSAKMTATFLSKKQEVNMSD **PVLD**CVRDQAINKLQQIFN~~AS~~SYNQTYEKYGNVSVFETTGGGLV  
 8821 (342) TCQLTFWEASERTIRSEAE SYHFSSAKMTATFLSKKQEVNMSD **PVLD**CVRDQAINKLQQIFN~~AS~~SYNQTYEKYGNVSVFETTGGGLV  
 TM-31354 (343) TCQLTFWEASERTIRSEAE SYHFSSAKMTATFLSKKQEVNMSD **PVLD**CVRNQAINKLQQIFN~~AS~~SYNQTYEKYGNVSVFETTGGGLV  
 VR1814 (343) TCQLTFWEASERTIRSEAE SYHFSSAKMTATFLSKKQEVNMSD **PVLD**CVRDQAINKLQQIFN~~AS~~SYNQTYEKYGNVSVFETTGGGLV  
 Consensus (345) TCQLTFWEASERTIRSEAE SYHFSSAKMTATFLSKKQEVNMSD **SALDCVRDEA** INKLQQIFNTSYNQTYEKYGNVSVFETTGGGLV

(431) 431 440 450 460 470 480 490 500 516

Merlin (429) VF~~W~~QGIKQKSLVLELERLANR **SSLNLT**HNRTKR**ST**TDGNNATHLSNMESVHNLVYAQLQFTYDTLRGIYINRALAQIAEAWCVDQRR**TL**  
 8816 (427) VF~~W~~QGIKQKSLVLELERLANR **SSLNLT**HNRTKR**ST**TDGNNATHLSNMESVHNLVYAQLQFTYDTLRGIYINRALAQIAEAWCVDQRR**TL**  
 8817 (429) VF~~W~~QGIKQKSLVLELERLANR **SSLNLT**HNRTKR**ST**TDGNNATHLSNMESVHNLVYAQLQFTYDTLRGIYINRALAQIAEAWCVDQRR**TL**  
 TR (430) VF~~W~~QGIKQKSLVLELERLANR **SSLNLT**HNRTKR**ST**TDGNNATHLSNMESVHNLVYAQLQFTYDTLRGIYINRALAQIAEAWCVDQRR**TL**  
 8819 (429) VF~~W~~QGIKQKSLVLELERLANR **SSLNLT**HNRTKR**ST**TDGNNATHLSNMESVHNLVYAQLQFTYDTLRGIYINRALAQIAEAWCVDQRR**TL**  
 8822 (429) VF~~W~~QGIKQKSLVLELERLANR **SSLNLT**HNRTKR**ST**TDGNNATHLSNMESVHNLVYAQLQFTYDTLRGIYINRALAQIAEAWCVDQRR**TL**  
 8824 (427) VF~~W~~QGIKQKSLVLELERLANR **SSLNLT**HNRTKR**ST**TDGNNATHLSNMESVHNLVYAQLQFTYDTLRGIYINRALAQIAEAWCVDQRR**TL**  
 TM-E28175 (429) VF~~W~~QGIKQKSLVLELERLANR **SSLNLT**HNRTKR**ST**TDGNNATHLSNMESVHNLVYAQLQFTYDTLRGIYINRALAQIAEAWCVDQRR**TL**  
 8818 (429) VF~~W~~QGIKQKSLVLELERLANR **SSGN**STR-RTKR**ST**TGN**TT**LSLES-ESVRNVLVYAQLQFTYDTLRGIYINRALAQIAEAWCVDQRR**TL**  
 8821 (428) VF~~W~~QGIKQKSLVLELERLANR **SSGN**STR-RTKR**ST**TGN**TT**LSLES-ESVRNVLVYAQLQFTYDTLRGIYINRALAQIAEAWCVDQRR**TL**  
 TM-31354 (429) VF~~W~~QGIKQKSLVLELERLANR **SSGN**STR-RTKR**ST**TGN**TT**LSLES-ESVRNVLVYAQLQFTYDTLRGIYINRALAQIAEAWCVDQRR**TL**  
 VR1814 (429) VF~~W~~QGIKQKSLVLELERLANR **SSGN**STR-RTKR**ST**TGN**TT**LSLES-ESVRNVLVYAQLQFTYDTLRGIYINRALAQIAEAWCVDQRR**TL**  
 Consensus (431) VF~~W~~QGIKQKSLVLELERLANR **SSLNLT**HNRTKR**ST**TDGNNATHLSNMESVHNLVYAQLQFTYDTLRGIYINRALAQIAEAWCVDQRR**TL**

Furin site

(517) 517 530 540 550 560 570 580 590 602

Merlin (515) EVFKELSKINPSAILSAIYNKPIAARFMGDVGLGLASCVTINQTSVKVLRDMNVK**ES**PGRCYSRPVVI~~FN~~FANSSYVQYGLGEDNE  
 8816 (513) EVFKELSKINPSAILSAIYNKPIAARFMGDVGLGLASCVTINQTSVKVLRDMNVK**ES**PGRCYSRPVVI~~FN~~FANSSYVQYGLGEDNE  
 8817 (515) EVFKELSKINPSAILSAIYNKPIAARFMGDVGLGLASCVTINQTSVKVLRDMNVK**ES**PGRCYSRPVVI~~FN~~FANSSYVQYGLGEDNE  
 TR (516) EVFKELSKINPSAILSAIYNKPIAARFMGDVGLGLASCVTINQTSVKVLRDMNVK**ES**PGRCYSRPVVI~~FN~~FANSSYVQYGLGEDNE  
 8819 (515) EVFKELSKINPSAILSAIYNKPIAARFMGDVGLGLASCVTINQTSVKVLRDMNVK**ES**PGRCYSRPVVI~~FN~~FANSSYVQYGLGEDNE  
 8822 (515) EVFKELSKINPSAILSAIYNKPIAARFMGDVGLGLASCVTINQTSVKVLRDMNVK**ES**PGRCYSRPVVI~~FN~~FANSSYVQYGLGEDNE  
 8824 (513) EVFKELSKINPSAILSAIYNKPIAARFMGDVGLGLASCVTINQTSVKVLRDMNVK**ES**PGRCYSRPVVI~~FN~~FANSSYVQYGLGEDNE  
 TM-E28175 (515) EVFKELSKINPSAILSAIYNKPIAARFMGDVGLGLASCVTINQTSVKVLRDMNVK**ES**PGRCYSRPVVI~~FN~~FANSSYVQYGLGEDNE  
 8818 (513) EVFKELSKINPSAILSAIYNKPIAARFMGDVGLGLASCVTINQTSVKVLRDMNVK**ES**PGRCYSRPVVI~~FN~~FANSSYVQYGLGEDNE  
 8821 (512) EVFKELSKINPSAILSAIYNKPIAARFMGDVGLGLASCVTINQTSVKVLRDMNVK**ES**PGRCYSRPVVI~~FN~~FANSSYVQYGLGEDNE  
 TM-31354 (513) EVFKELSKINPSAILSAIYNKPIAARFMGDVGLGLASCVTINQTSVKVLRDMNVK**ES**PGRCYSRPVVI~~FN~~FANSSYVQYGLGEDNE  
 VR1814 (513) EVFKELSKINPSAILSAIYNKPIAARFMGDVGLGLASCVTINQTSVKVLRDMNVK**ES**PGRCYSRPVVI~~FN~~FANSSYVQYGLGEDNE  
 Consensus (517) EVFKELSKINPSAILSAIYNKPIAARFMGDVGLGLASCVTINQTSVKVLRDMNVK**ES**PGRCYSRPVVI~~FN~~FANSSYVQYGLGEDNE

(603) 603 610 620 630 640 650 660 670 688

Merlin (601) ILLGNHRTEECQ**L**PSLKIPIAGNSAYEYVDYLFKRMIDLSSI~~ST~~VDSMIALDIDPLENTDFRVLLEYLSQKELRSSNVFDLEEIMRE  
 8816 (599) ILLGNHRTEECQ**L**PSLKIPIAGNSAYEYVDYLFKRMIDLSSI~~ST~~VDSMIALDIDPLENTDFRVLLEYLSQKELRSSNVFDLEEIMRE  
 8817 (601) ILLGNHRTEECQ**L**PSLKIPIAGNSAYEYVDYLFKRMIDLSSI~~ST~~VDSMIALDIDPLENTDFRVLLEYLSQKELRSSNVFDLEEIMRE  
 TR (602) ILLGNHRTEECQ**L**PSLKIPIAGNSAYEYVDYLFKRMIDLSSI~~ST~~VDSMIALDIDPLENTDFRVLLEYLSQKELRSSNVFDLEEIMRE  
 8819 (601) ILLGNHRTEECQ**L**PSLKIPIAGNSAYEYVDYLFKRMIDLSSI~~ST~~VDSMIALDIDPLENTDFRVLLEYLSQKELRSSNVFDLEEIMRE  
 8822 (601) ILLGNHRTEECQ**L**PSLKIPIAGNSAYEYVDYLFKRMIDLSSI~~ST~~VDSMIALDIDPLENTDFRVLLEYLSQKELRSSNVFDLEEIMRE  
 8824 (599) ILLGNHRTEECQ**L**PSLKIPIAGNSAYEYVDYLFKRMIDLSSI~~ST~~VDSMIALDIDPLENTDFRVLLEYLSQKELRSSNVFDLEEIMRE  
 TM-E28175 (601) ILLGNHRTEECQ**L**PSLKIPIAGNSAYEYVDYLFKRMIDLSSI~~ST~~VDSMIALDIDPLENTDFRVLLEYLSQKELRSSNVFDLEEIMRE  
 8818 (599) ILLGNHRTEECQ**L**PSLKIPIAGNSAYEYVDYLFKRMIDLSSI~~ST~~VDSMIALDIDPLENTDFRVLLEYLSQKELRSSNVFDLEEIMRE  
 8821 (598) ILLGNHRTEECQ**L**PSLKIPIAGNSAYEYVDYLFKRMIDLSSI~~ST~~VDSMIALDIDPLENTDFRVLLEYLSQKELRSSNVFDLEEIMRE  
 TM-31354 (599) ILLGNHRTEECQ**L**PSLKIPIAGNSAYEYVDYLFKRMIDLSSI~~ST~~VDSMIALDIDPLENTDFRVLLEYLSQKELRSSNVFDLEEIMRE  
 VR1814 (599) ILLGNHRTEECQ**L**PSLKIPIAGNSAYEYVDYLFKRMIDLSSI~~ST~~VDSMIALDIDPLENTDFRVLLEYLSQKELRSSNVFDLEEIMRE  
 Consensus (603) ILLGNHRTEECQ**L**PSLKIPIAGNSAYEYVDYLFKRMIDLSSI~~ST~~VDSMIALDIDPLENTDFRVLLEYLSQKELRSSNVFDLEEIMRE

Contd.

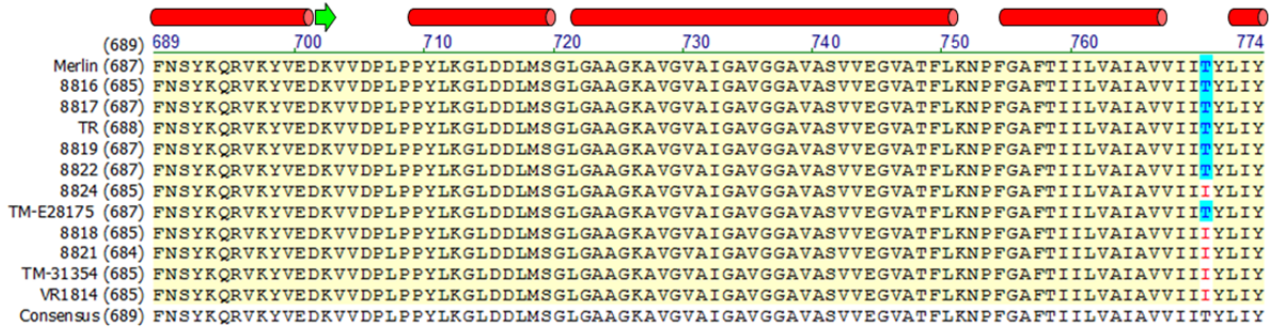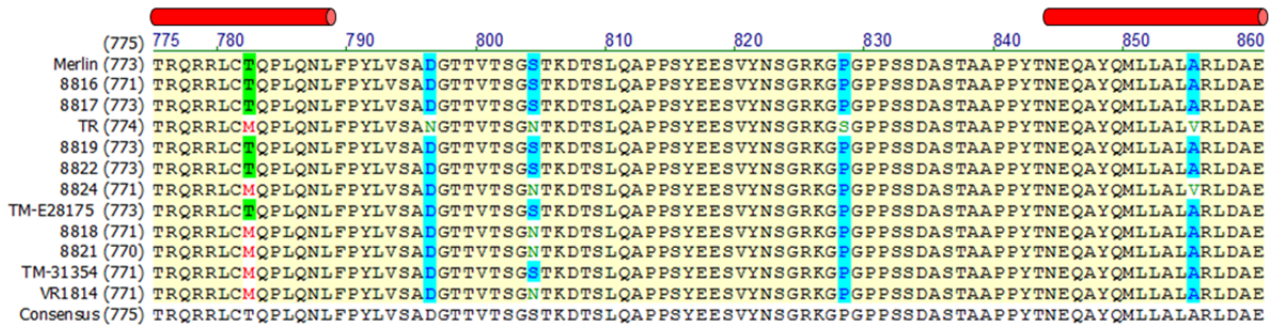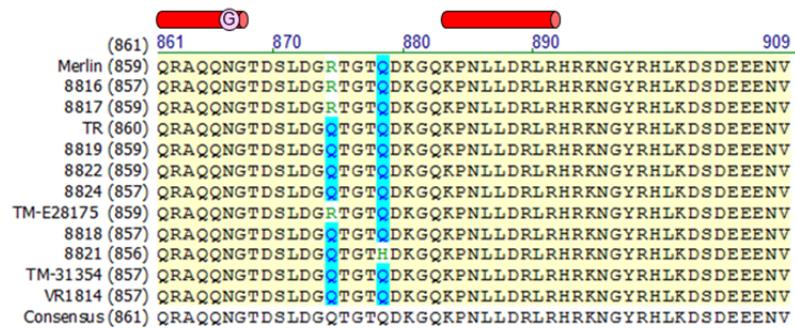

**Supplementary Figure 5. Sequence alignment of gB from various HCMV strains.** Full length gB sequences from 12 strains of HCMV were aligned using AlignX (Vector NTI, Invitrogen Inc.). Secondary structure elements are represented as red cylinders for helices and green arrows for beta sheets, as predicted for the Merlin strain sequence using the JPRED server (University of Dundee).



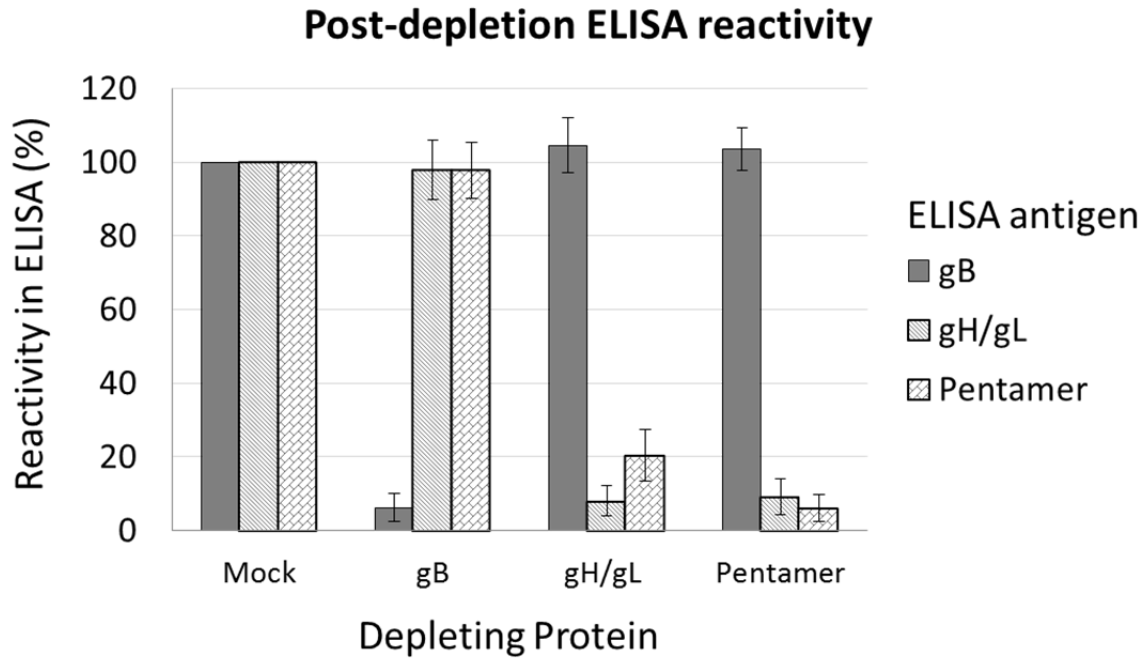

**Supplementary Figure 6. Depletion efficiency and specificity of soluble gB, gH/gL and pentamer on human sera.** Sera incubated with gB-698glyc, gH/gL or pentamer as described in Table 4 were tested for remaining reactivity to the respective proteins in an ELISA assay. Titers are expressed as a percentage of titers from mock-depleted sera. The x-axis represents the depleting protein. Error bars represent standard deviation across five individual serum samples.

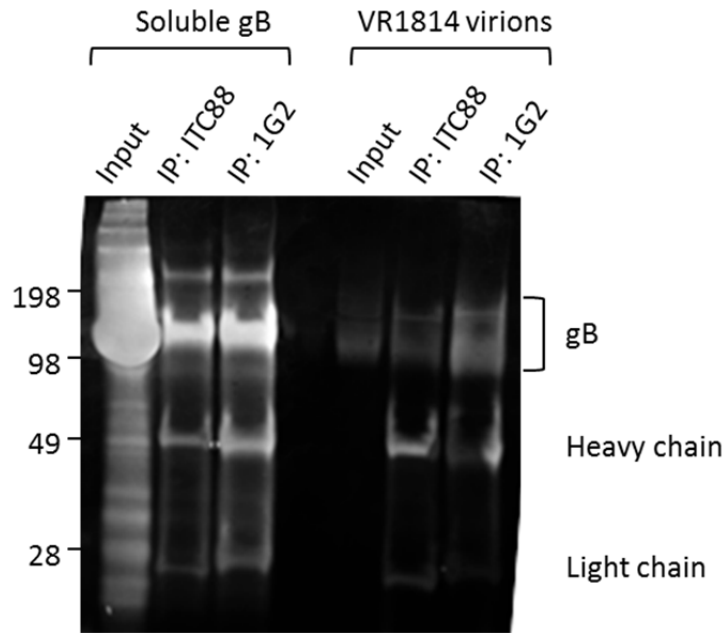

**Supplementary Figure 7. Western blot for gB immunoprecipitated from purified VR1814 virions.** Uncropped gel image for western blot shown in Figure 5B.



**Supplementary Table 1 RMSD among herpesviruses postfusion gBs**

| gB Domain<br>(residues in<br>CMV gB) | 2GUM<br>(HSV gB) | 3FVC<br>(EBV gB) | 4OSN (CMV<br>gB AD-4<br>alone) | 4OT1 (CMV gB<br>AD-4 – SM5<br>complex) |
|--------------------------------------|------------------|------------------|--------------------------------|----------------------------------------|
| I (134-343)*                         | 2.96             | 2.679            |                                |                                        |
| II (344-436)                         | 2.7              | 2.3              | 0.983                          | 0.754                                  |
| III (479-533)                        | 0.951            | 0.851            |                                |                                        |
| IV (88-103,<br>538-638)              | 2.12             | 1.533            |                                |                                        |
| V (642-695)                          | 2.744            | 2.487            |                                |                                        |

\* Domain I was aligned defining residue ranges 136-274, 297-303 and 321-335.

HCMV gB domains were individually superimposed onto corresponding domains from HSV or EBV gBs or to the isolated AD-4 domain structures using LSQKAB in the CCP4 suite. The boundaries of the domains are indicated in parentheses. Domain I was defined as residue ranges 136-274, 297-303 and 321-335.

**Supplementary Table 2 Contact residues at the gB-1G2 interface**

| Residue in gB |     | Atom | Residue in 1G2 |      | Atom | Distance (Å) |
|---------------|-----|------|----------------|------|------|--------------|
| Tyr           | 280 | OH   | Tyr            | 103H | N    | 3.28         |
| Gly           | 282 | O    | Asn            | 102H | OD1  | 2.64         |
|               |     |      | Tyr            | 103H | O    | 2.59         |
| Gly           | 282 | C    | Tyr            | 103H | O    | 3.39         |
| Thr           | 283 | O    | Asn            | 102H | CG   | 3.1          |
|               |     |      | Asn            | 102H | OD1  | 2.61         |
|               |     |      | Asn            | 102H | ND2  | 3.06         |
|               |     | CA   | Asn            | 102H | OD1  | 3.28         |
|               |     | C    | Asn            | 102H | OD1  | 2.9          |
|               |     | CG2  | Phe            | 105H | CZ   | 3.47         |
|               |     | OG1  | Tyr            | 50L  | OH   | 3.5          |
| Arg           | 285 | CB   | Trp            | 101H | O    | 3.38         |
|               |     | CG   | Trp            | 101H | NE1  | 3.22         |
|               |     | CD   | Trp            | 101H | O    | 3            |
|               |     | CZ   | Ser            | 32H  | OG   | 3.5          |
|               |     | NH1  | Ser            | 32H  | O    | 3.38         |
|               |     |      | Ser            | 32H  | O    | 3.46         |
|               |     |      | Ser            | 32H  | OG   | 2.66         |
| Asn           | 286 | CB   | Tyr            | 109H | OH   | 3.05         |
|               |     | CG   | Tyr            | 109H | OH   | 3.31         |
| Phe           | 290 | CD2  | Ser            | 32H  | OG   | 3.27         |
| Gly           | 291 | O    | Arg            | 31H  | NH1  | 2.95         |
| Glu           | 292 | O    | Ser            | 32H  | CB   | 3.24         |
| Ala           | 294 | N    | Arg            | 31H  | O    | 2.61         |
|               |     | CA   | Arg            | 31H  | O    | 3.39         |
|               |     | CB   | Arg            | 31H  | O    | 3.1          |
| Ile           | 299 | O    | Tyr            | 103H | CE2  | 3.39         |
|               |     |      | Phe            | 104H | CE1  | 3.44         |
|               |     | N    | Tyr            | 103H | CE2  | 3.12         |
|               |     |      | Tyr            | 103H | CZ   | 3.4          |
|               |     |      | Tyr            | 103H | OH   | 3.49         |
|               |     | CG1  | Tyr            | 103H | CD2  | 3.45         |

Table of contact residues within a 3.5 Å cutoff was generated using the CONTACT program within the CCP4 suite.



**Supplementary Table 3. Details of SPR analysis of gB-1G2 interaction**

| Sample          | Rmax (RU)   | Chi <sup>2</sup> (RU <sup>2</sup> ) | Ligand Level (RU) | Max binding (RU) | Capture-adjusted max binding |      |
|-----------------|-------------|-------------------------------------|-------------------|------------------|------------------------------|------|
| gB mutants      | ΔNgB-glyco  | 60.5                                | 0.0582            | 106.2            | 36.4                         | 0.34 |
|                 | Y280A       | 260.2                               | 0.0535            | 92               | 5.1                          | 0.06 |
|                 | N281A       | 41.2                                | 0.0565            | 95.7             | 17.7                         | 0.18 |
|                 | T283A       | 38.4                                | 0.0709            | 95.6             | 20.9                         | 0.22 |
|                 | N284A       | 75.4                                | 0.284             | 220.9            | 50.4                         | 0.23 |
|                 | R285A       | 36.8                                | 0.0905            | 91.8             | 2                            | 0.02 |
|                 | N286A       | 122.2                               | 1.76              | 222.9            | 111.6                        | 0.5  |
|                 | NRN-AAA*    | 0.6                                 | 0.574             | 219.9            | 4.6                          | 0.02 |
|                 | F290A       | 34.5                                | 0.0512            | 97.6             | 6                            | 0.06 |
|                 | E292A       | 39.8                                | 0.0492            | 97.7             | 12                           | 0.12 |
|                 | N293A/D295A | 81.6                                | 0.152             | 224.1            | 45.2                         | 0.2  |
|                 | YND-AAA**   | 51.1                                | 0.0498            | 93.8             | 3.5                          | 0.04 |
|                 | F297A       | 176.6                               | 0.0491            | 97.6             | 9.1                          | 0.09 |
|                 | F298A       | 42.2                                | 0.0512            | 102.1            | 18                           | 0.18 |
|                 | I299A       | 38.8                                | 0.0614            | 101.6            | 13.3                         | 0.13 |
| F298A/I299A     | 72          | 0.102                               | 94.6              | 2.9              | 0.03                         |      |
| 1G2             | WT          | 25.6                                | 0.0735            | 44.3             | 14.2                         | 0.32 |
| 1G2 heavy chain | R31S        | 24.1                                | 0.0545            | 34.4             | 12.7                         | 0.37 |
|                 | S32A        | 30.5                                | 0.0922            | 56.3             | 20.5                         | 0.36 |
|                 | N102A       | 17.5                                | 0.0802            | 55.8             | 9.9                          | 0.18 |
|                 | Y103A       | 14.9                                | 0.0721            | 44.3             | 8.5                          | 0.19 |
|                 | F104A       | 20.9                                | 0.0753            | 49.3             | 11.5                         | 0.23 |
|                 | Y103A/F104A | 7.1                                 | 0.083             | 44.4             | 4.9                          | 0.11 |
|                 | Y109A       | 22.5                                | 0.0776            | 43.6             | 13.1                         | 0.3  |
| 1G2 light chain | Y50A        | 25.2                                | 0.0806            | 54.4             | 15.7                         | 0.29 |
|                 | R51A        | 26.4                                | 0.0784            | 60.2             | 15.8                         | 0.26 |

\*NRN-AAA = N284A/R285A/N286A

\*\*YND-AAA = Y280A/N293A/D295A

Rmax, Chi<sup>2</sup>, ligand level, max binding level and capture-adjusted max binding level for the single cycle kinetic runs reported in Table 3. While these values are reported for the 1G2 double mutant Tyr103Ala/Phe104Ala, we could not get a reliable fit for the curve for measuring the kinetic constants reported in Table 2.
